# Supplementary material for: Graphene acid-enhanced interfacial layers with high Zn2+ ion selectivity and desolvation capability for corrosion-resistant Zn-metal anodes
Source: Royal Society of Chemistry journal article supplement (doi:10.1039/d4ta03599b), 2024-01-01
Supplement: d4ta03599b1.pdf [file d4ta03599b1.pdf]

## Supporting Information

### Graphene Acid-enhanced Interfacial Layers with High Zn<sup>2+</sup> Ions Selectivity and Desolvation Capability for Corrosion-resistant Zn-metal Anodes

**Kailai Xia,<sup>a</sup> Liuyan Li,<sup>a</sup> Yanbin Qiu,<sup>a</sup> Jianqiang Weng,<sup>a</sup> Shengtao Shen,<sup>a</sup>  
Meixin,<sup>a</sup> Yuhang Zhuang,<sup>a</sup> Yeye Wen,<sup>\*b</sup> Chengkai Yang,<sup>\*a</sup> Zheyuan Liu,<sup>a</sup>  
Mingmao Wu,<sup>\*a,c</sup> Zhigang Zou<sup>d</sup>**

<sup>a</sup> Key Laboratory of Advanced Materials Technologies, International (HongKong Macao and Taiwan) Joint Laboratory on Advanced Materials Technologies, College of Materials Science and Engineering, Fuzhou University, Fuzhou, 350108, P. R. China

<sup>b</sup> Advanced Research Institute of Multidisciplinary Science, Beijing Institute of Technology, Beijing, 100081, P. R. China

<sup>c</sup> Fujian Science & Technology Innovation Laboratory for Optoelectronic Information of China, Fuzhou, Fujian 350108, P. R. China

<sup>d</sup> National Laboratory of Solid State Microstructures, Department of Physics, Nanjing University, Nanjing, 210093, P. R. China

\*Corresponding authors.

E-mail: [wumm20@fzu.edu.cn](mailto:wumm20@fzu.edu.cn) (M. M. Wu); [chengkai\\_yang@fzu.edu.cn](mailto:chengkai_yang@fzu.edu.cn) (C. K. Yang); [wenyy@bit.edu.cn](mailto:wenyy@bit.edu.cn) (Y. Y. Wen).

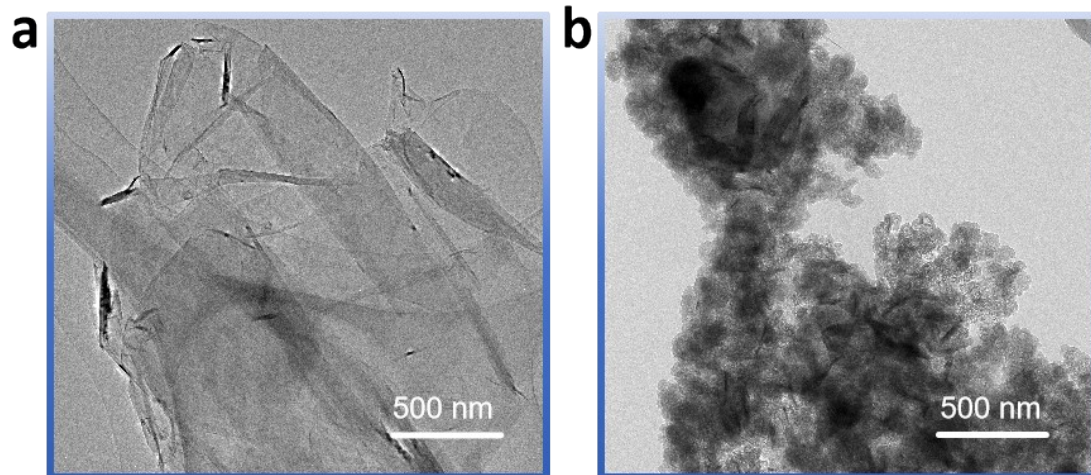

**Fig. S1.** TEM images of (a) GO and (b) GA.

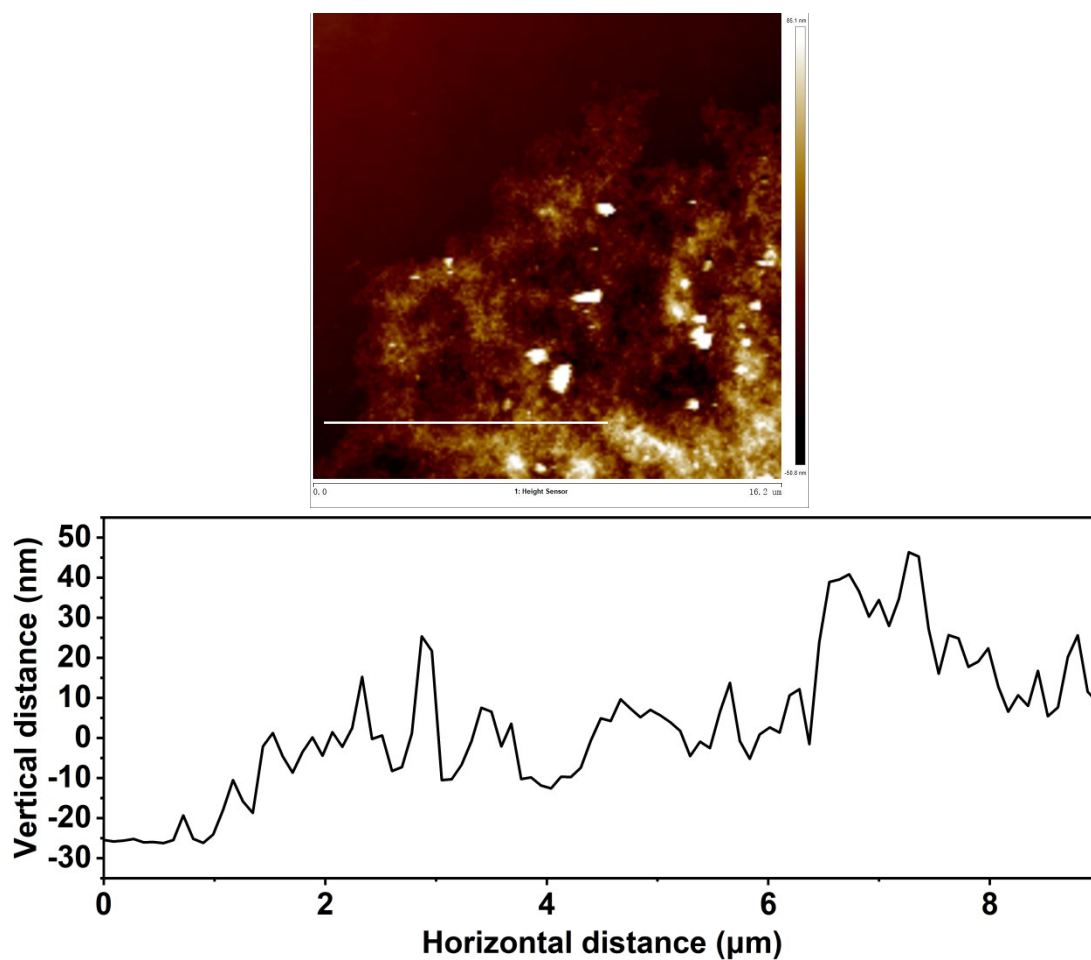

**Fig. S2.** AFM morphology of GA and corresponding height profiles.

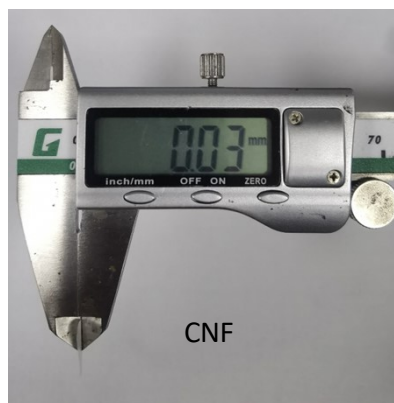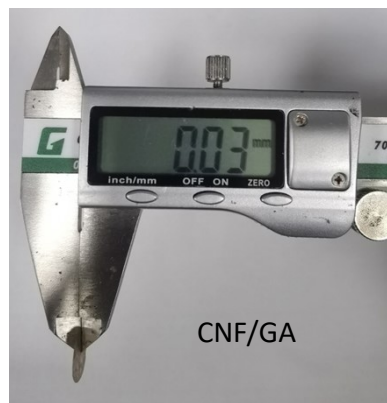

**Fig. S3.** Digital images of CNF membrane and CNF/GA membrane measured with vernier calipers.

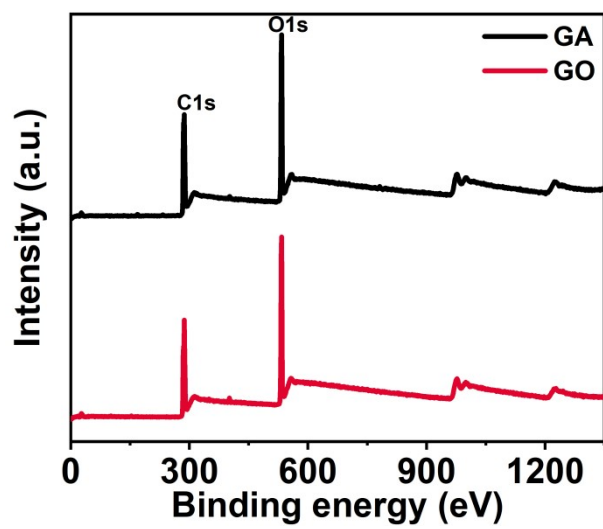

Fig. S4. XPS spectra of GO and GA.

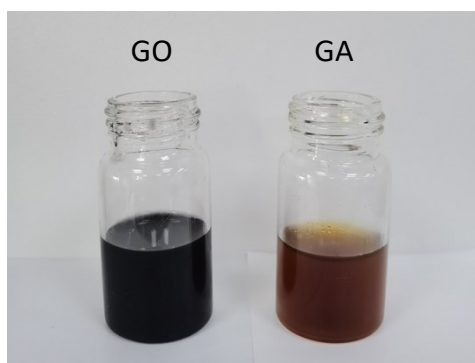

**Fig. S5.** Digital image of 5 mg mL<sup>-1</sup> GO and GA solutions.

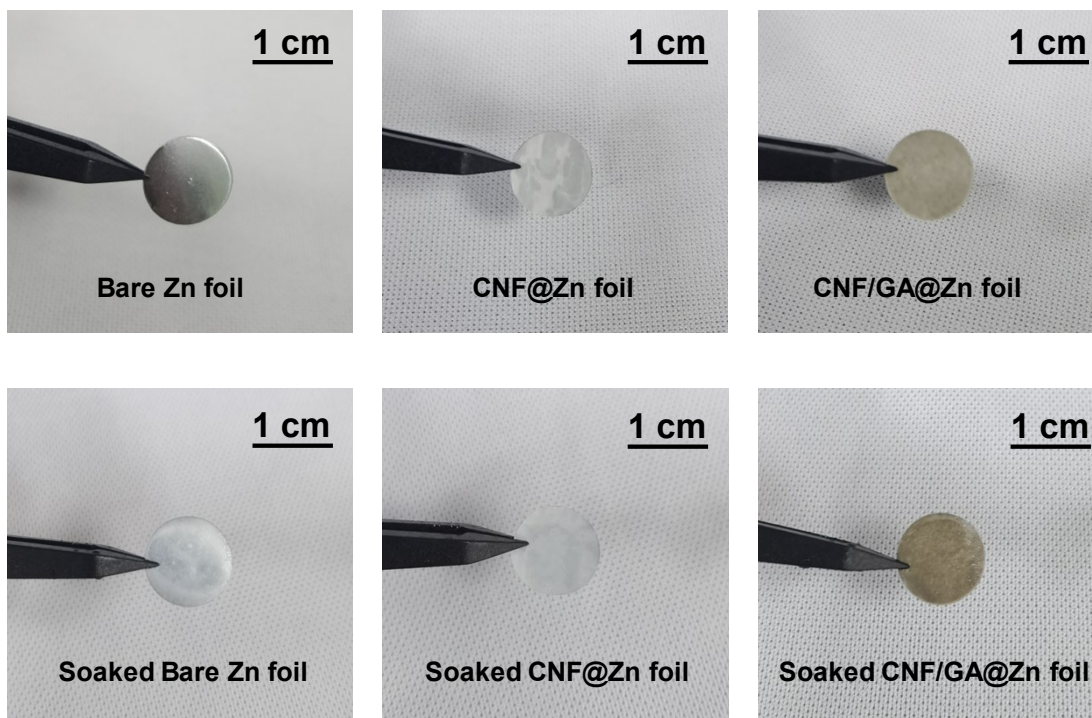

**Fig. S6.** Digital images of the bare Zn, CNF@Zn, and CNF/GA@Zn anodes before (upper row) and after soaking (lower row) in 2 M ZnSO<sub>4</sub> electrolyte for 7 days.

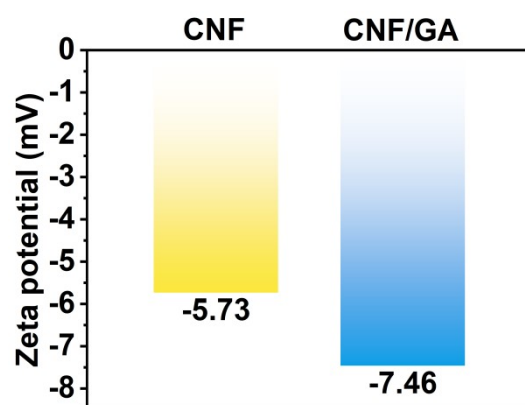

**Fig. S7.** The Zeta potential of CNF and CNF/GA solutions.



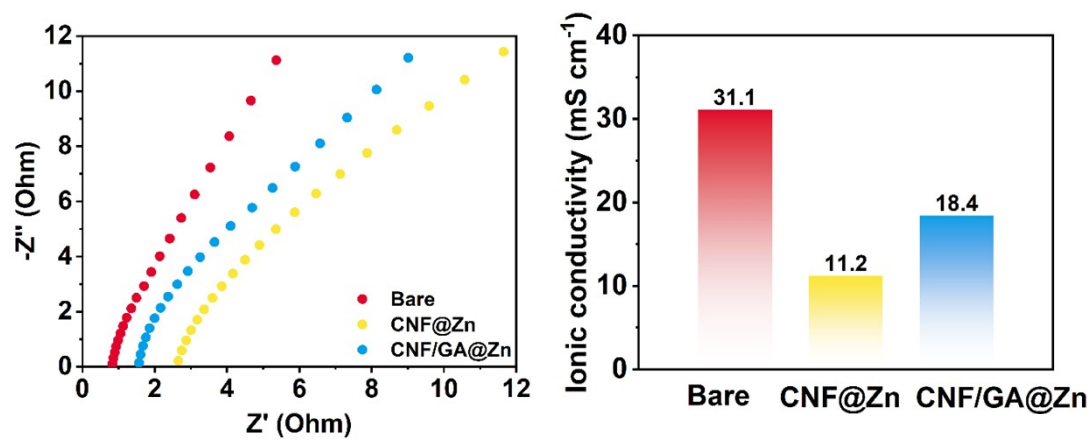

**Fig. S8.** Ionic conductivity of the symmetric cells based on bare Zn, CNF@Zn, and CNF/GA@Zn anodes.

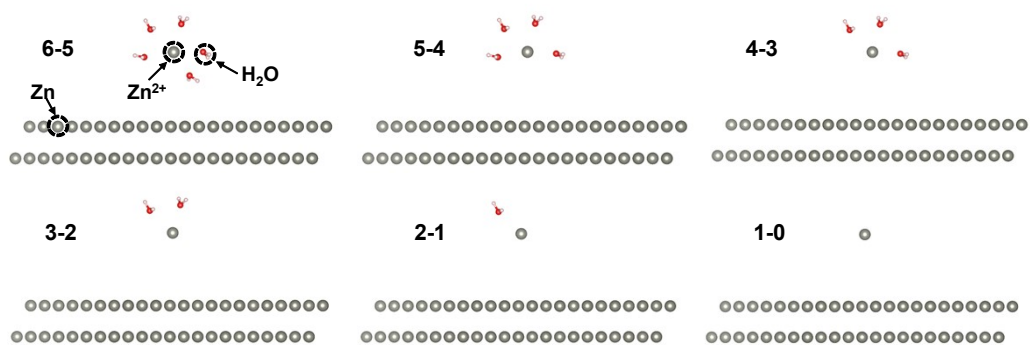

**Fig. S9.** Simulated desolvation process of  $\text{Zn}^{2+}$  ions by sequential removal of 6  $\text{H}_2\text{O}$  on bare Zn surface.

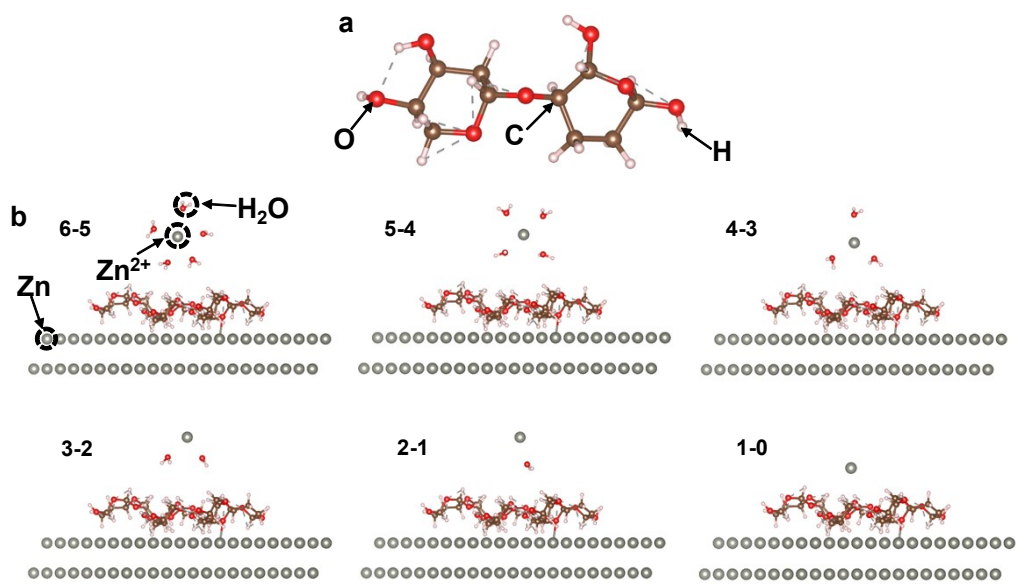

**Fig. S10.** (a) Constructed CNF molecular structure model. (b) Simulated desolvation process of  $Zn^{2+}$  ions by sequential removal of six  $H_2O$  on CNF@Zn surface.

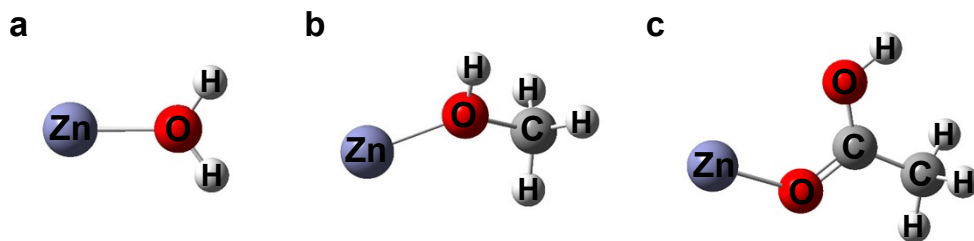

**Fig. S11.** Simulated binding energy between Zn<sup>2+</sup> ions and (a) H<sub>2</sub>O, (b) -OH, (c) -COOH.

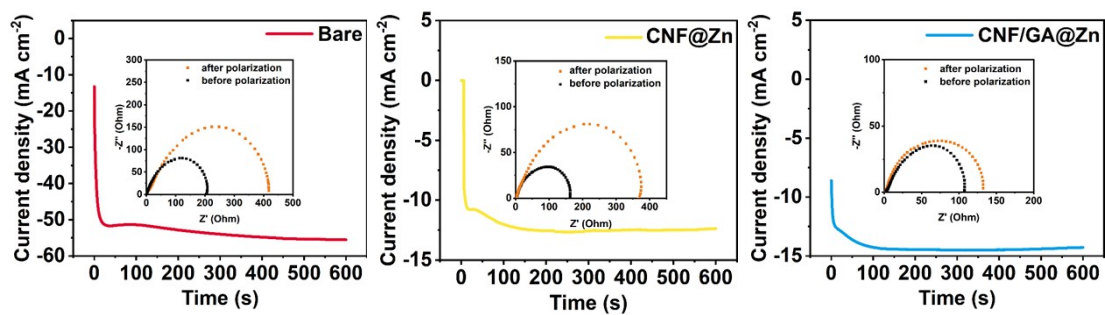

**Fig. S12.** Current-time plots of the symmetric cells based on bare Zn, CNF@Zn, and CNF/GA@Zn anodes (inset: the Nyquist polts before and after polarization).

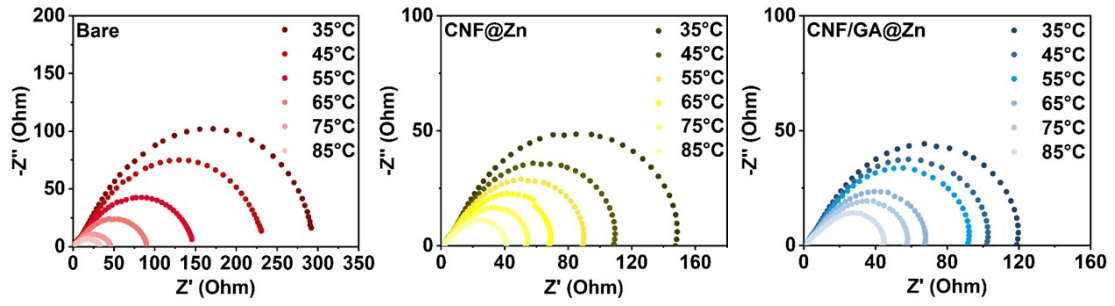

**Fig. S13.** Nyquist plots of the symmetric cells based on bare Zn, CNF@Zn, and CNF/GA@Zn anodes at the temperature of 35 °C, 45 °C, 55 °C, 65 °C, 75 °C, and 85 °C.

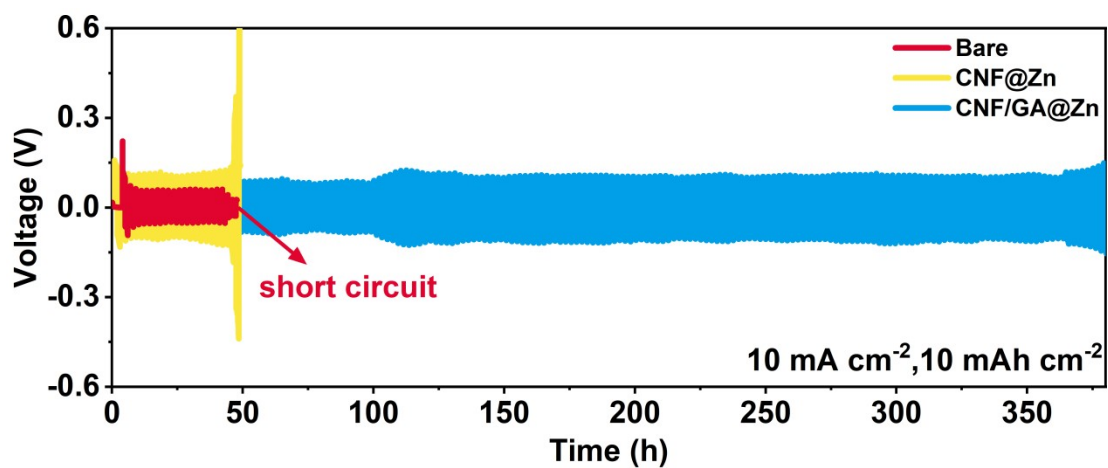

**Fig. S14.** Long-term cycling performance of the symmetric cells based on bare Zn, CNF@Zn, and CNF/GA@Zn anodes at a current density of  $10 \text{ mA cm}^{-2}$  with a capacity of  $10 \text{ mAh cm}^{-2}$ .

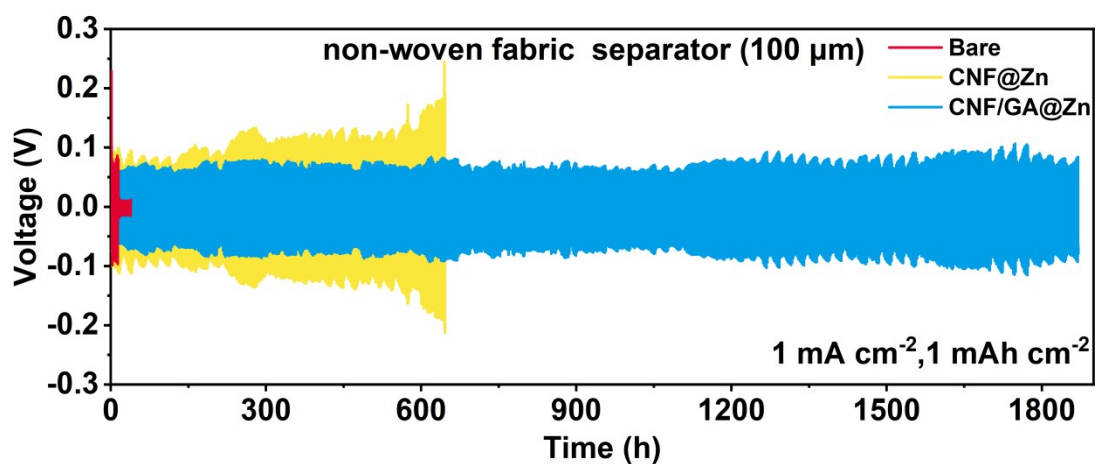

**Fig. S15.** Long-term cycling performance of symmetric cells assembled with non-woven separators at  $1 \text{ mA cm}^{-2}$  and  $1 \text{ mAh cm}^{-2}$ .



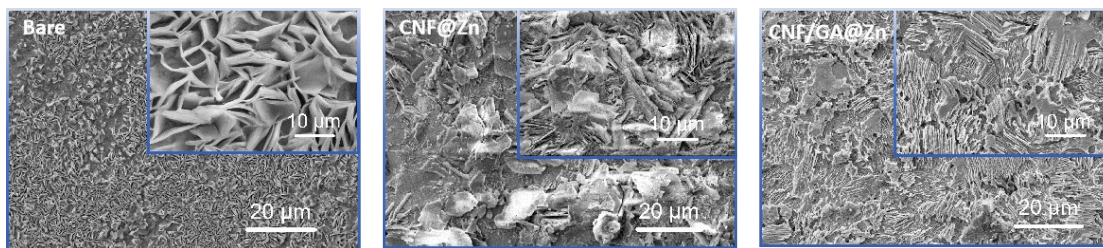

**Fig. S16.** SEM images of bare Zn, CNF@Zn, and CNF/GA@Zn after 1 cycle at the current density of  $1 \text{ mA cm}^{-2}$  with a capacity of  $1 \text{ mAh cm}^{-2}$

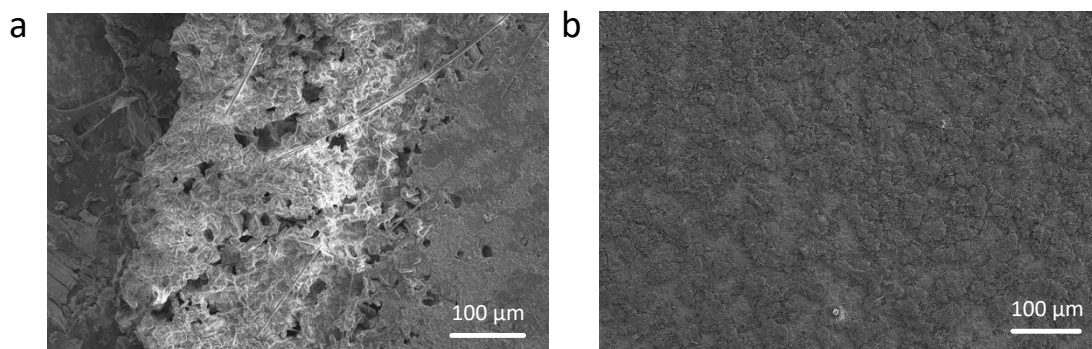

**Fig. S17.** SEM images of (a) bare Zn and (b) CNF/GA@Zn surface after cycling at  $1 \text{ mA cm}^{-2}$ ,  $1 \text{ mAh cm}^{-2}$  for 300 hours.

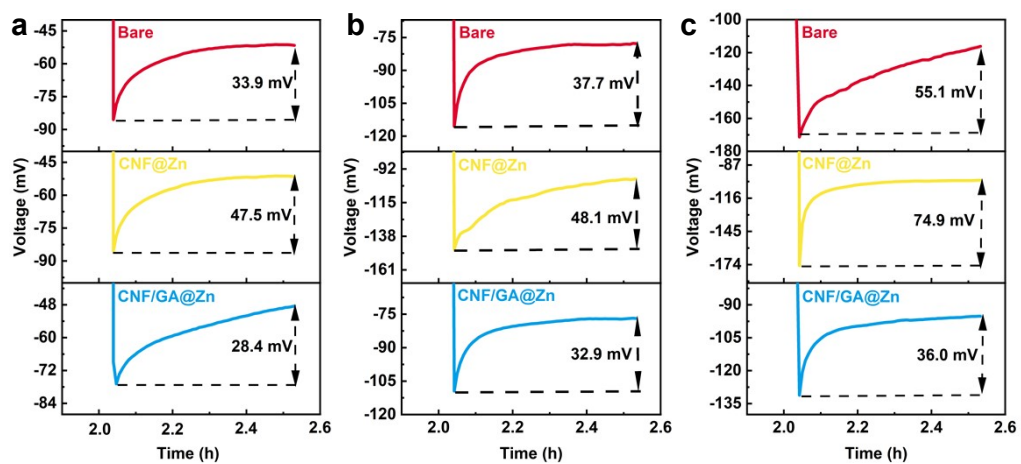

**Fig. S18.** Nucleation overpotential of the symmetric cells based on bare Zn, CNF@Zn, and CNF/GA@Zn at different densities of (a)  $1 \text{ mA cm}^{-2}$ ,  $1 \text{ mAh cm}^{-2}$ , (b)  $5 \text{ mA cm}^{-2}$ ,  $5 \text{ mAh cm}^{-2}$  and (c)  $10 \text{ mA cm}^{-2}$ ,  $10 \text{ mAh cm}^{-2}$ .

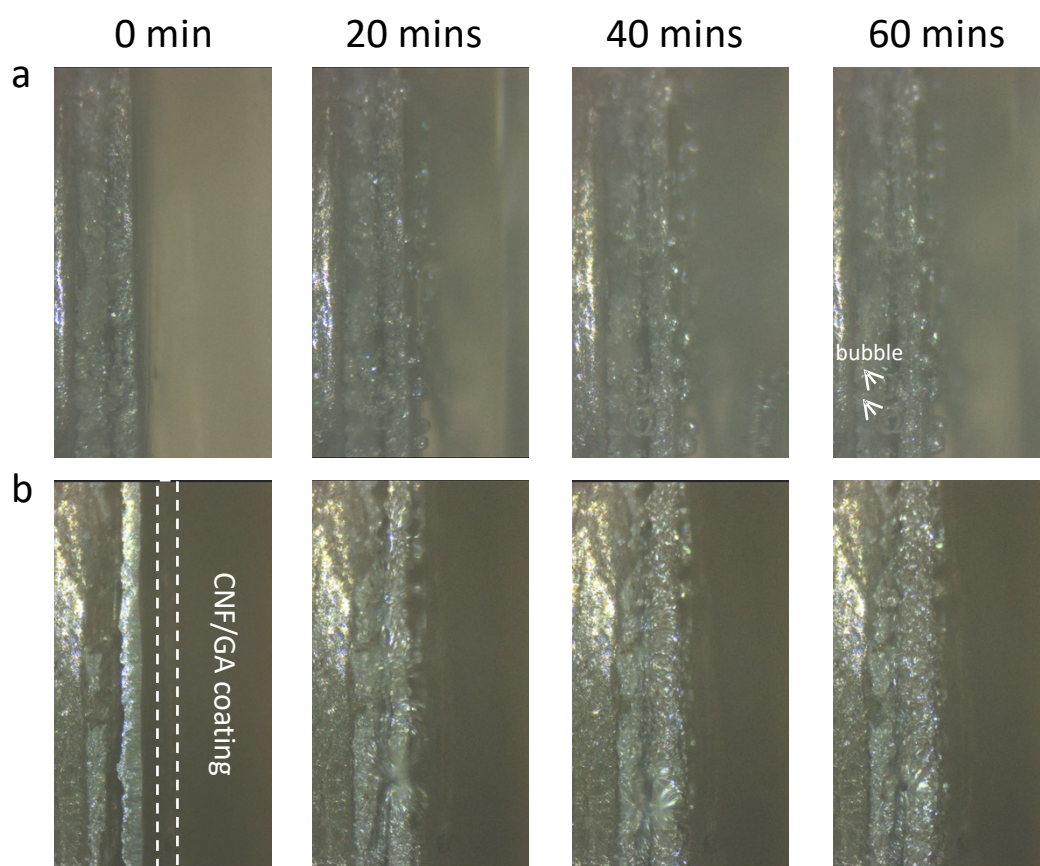

**Fig. S19.** Situ optical microscopy image of (a) bare Zn and (b) CNF/GA@Zn surface after depositing at  $10 \text{ mA cm}^{-2}$  for 0, 20, 40, 60 mins.

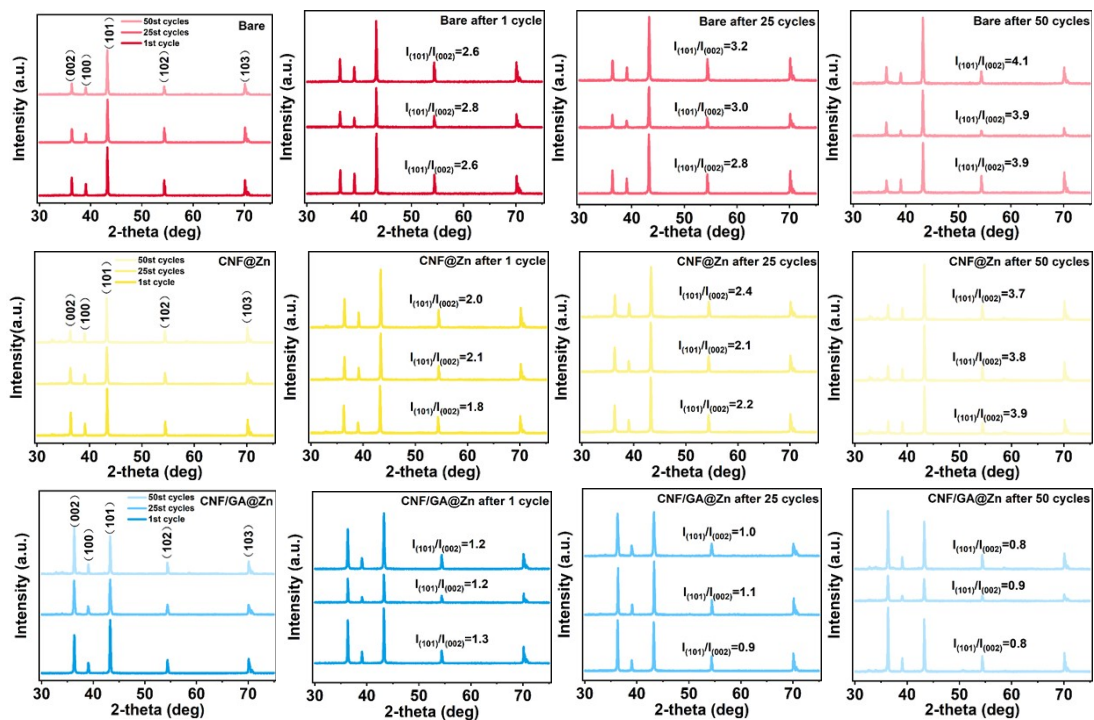

**Fig. S20.** XRD patterns at three different positions on the surface of the Zn anode after 1, 25, and 50 cycles at  $1 \text{ mA cm}^{-2}$ ,  $1 \text{ mAh cm}^{-2}$ .

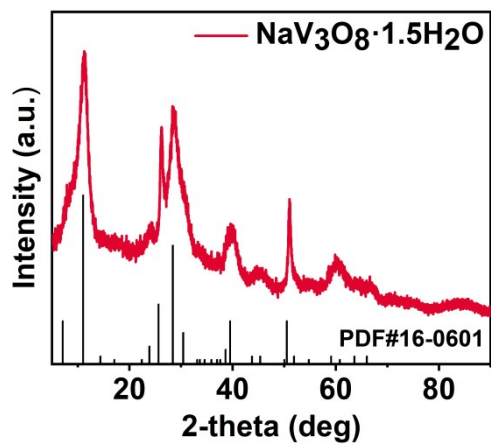

**Fig. S21.** XRD curve of the NaV<sub>3</sub>O<sub>8</sub>·1.5H<sub>2</sub>O.

**Table S1.** Comparison of electrochemical performance of the different Zn anode protection scheme for symmetric cells

| Anode                                | Current density and capacity                        | Cycle life | Reference |
|--------------------------------------|-----------------------------------------------------|------------|-----------|
| NGO <sup>a)</sup>                    | 1 mA cm <sup>-2</sup> , 1 mAh cm <sup>-2</sup>      | 1200 h     | [S1]      |
| CNF/Zn@Zn <sup>b)</sup>              | 2 mA cm <sup>-2</sup> , 1 mAh cm <sup>-2</sup>      | 260 h      | [S2]      |
| NBC@Zn <sup>c)</sup>                 | 2 mA cm <sup>-2</sup> , 1 mAh cm <sup>-2</sup>      | 1200 h     | [S3]      |
| CAZ@Zn <sup>d)</sup>                 | 1 mA cm <sup>-2</sup> , 1 mAh cm <sup>-2</sup>      | 2750 h     | [S4]      |
| Sep-OH <sup>e)</sup>                 | 5 mA cm <sup>-2</sup> , 1 mAh cm <sup>-2</sup>      | 800 h      | [S5]      |
| CNF-SO <sub>3</sub> Zn <sup>f)</sup> | 1 mA cm <sup>-2</sup> , 0.5 mAh cm <sup>-2</sup>    | 100 h      | [S6]      |
| CNF/MXene@Zn <sup>g)</sup>           | 1 mA cm <sup>-2</sup> , 1 mAh cm <sup>-2</sup>      | 2800 h     | [S7]      |
| SA-coated Zn <sup>h)</sup>           | 0.5 mA cm <sup>-2</sup> , 0.5 mAh cm <sup>-2</sup>  | 920 h      | [S8]      |
| ZC separator <sup>i)</sup>           | 0.5 mA cm <sup>-2</sup> , 0.25 mAh cm <sup>-2</sup> | 2000 h     | [S9]      |
| CNF/GA@Zn                            | 1 mA cm <sup>-2</sup> , 1 mAh cm <sup>-2</sup>      | 2920 h     | This work |
|                                      | 5 mA cm <sup>-2</sup> , 5 mAh cm <sup>-2</sup>      | 850 h      |           |
|                                      | 10 mA cm <sup>-2</sup> , 10 mAh cm <sup>-2</sup>    | 380 h      |           |

<sup>a)</sup> NGO = an artificial interface film of nitrogen (N)-doped graphene oxide;

<sup>b)</sup> CNF/Zn@Zn = a lightweight and flexible three-dimensional carbon nanofiber architecture with uniform Zn seeds prepared from bacterial cellulose;

<sup>c)</sup> NBC@Zn = an amino-grafted bacterial cellulose film;

<sup>d)</sup> CAZ@Zn = an ion-affiliative cellulose acetate coating with Zn(CF<sub>3</sub>SO<sub>3</sub>)<sub>2</sub>;

<sup>e)</sup> Sep-OH = a coating prepared from sepiolite and its derived materials;

<sup>f)</sup> CNF-SO<sub>3</sub>Zn = a multifunctional aqueous ZB separator based on a single-ion-functionalized cellulose nanofiber membrane;

<sup>g)</sup> CNF/MXene@Zn = a cellulose nanofiber/MXene composite membrane;

<sup>h)</sup> SA-coated Zn = an anionic polyelectrolyte alginate acid coating;

<sup>i)</sup> ZC separator = a cellulose nanofibers-ZrO<sub>2</sub> composite separator;

**Table S2.** Comparison of Self-discharge performance of the different Zn anode protection scheme for full cells

| Programme                                  | Cathode                                      | standing time | Capacity retention | Reference |
|--------------------------------------------|----------------------------------------------|---------------|--------------------|-----------|
| CS and SA coating <sup>a)</sup>            | H <sub>2</sub> V <sub>3</sub> O <sub>8</sub> | 24 h          | 85%                | [S10]     |
| Na <sub>3</sub> NTA additive <sup>b)</sup> | V <sub>2</sub> O <sub>5</sub>                | 24 h          | 83%                | [S11]     |
| KTPP additive <sup>c)</sup>                | MnO <sub>2</sub>                             | 24 h          | 88%                | [S12]     |
| NBC layer                                  | V <sub>2</sub> O <sub>5</sub>                | 24 h          | 94.94%             | [S3]      |
| β-CD additive <sup>d)</sup>                | V <sub>2</sub> O <sub>5</sub>                | 36 h          | 71%                | [S13]     |
| ACE additive <sup>e)</sup>                 | V <sub>2</sub> O <sub>5</sub>                | 24 h          | 82.95%             | [S14]     |
| Irgacure 2959 additive <sup>f)</sup>       | VS <sub>2</sub>                              | 24 h          | 96.4%              | [S15]     |
| Thiourea additive                          | V <sub>2</sub> O <sub>5</sub>                | 24 h          | 98.03%             | [S16]     |
| CNF/GA coating                             | NVO                                          | 24 h          | 99%                | This work |

<sup>a)</sup> CS and SA coating = a film consisted by chitosan and sodium alginate;

<sup>b)</sup> Na<sub>3</sub>NTA additive = trisodium nitrilotriacetate;

<sup>c)</sup> KTPP additive = penta-potassium triphosphate electrolyte;

<sup>d)</sup> β-CD additive = β-cyclodextrin electrolyte;

<sup>e)</sup> ACE additive = acesulfame electrolyte;

<sup>f)</sup> Irgacure 2959 additive = 2-Hydroxy-4'-(2-hydroxyethoxy)-2-methylpropiophenon;



## References

- [S1] L. Kang, J. Zheng, K. Yue, H. Yuan, J. Luo, Y. Wang, Y. Liu, J. Nai and X. Tao, *Small*, 2023, 19, 2304094.
- [S2] X. Liu, Q. Han, Q. Ma, Y. Wang and C. Liu, *Small*, 2022, 18, 2203327.
- [S3] X. Ge, W. Zhang, F. Song, B. Xie, J. Li, J. Wang, X. Wang, J. Zhao and G. Cui, *Adv. Funct. Mater.*, 2022, 32, 2200429.
- [S4] H. Dong, X. Hu, R. Liu, M. Ouyang, H. He, T. Wang, X. Gao, Y. Dai, W. Zhang, Y. Liu, Y. Zhou, D. J. L. Brett, I. P. Parkin, P. R. Shearing and G. He, *Angew. Chem., Int. Ed.*, 2023, 62, e202311268.
- [S5] W. Xu, X. Liao, W. Xu, K. Zhao, G. Yao and Q. Wu, *Adv. Energy Mater.*, 2023, 13, 2300283.
- [S6] J. Cao, D. Zhang, C. Gu, X. Zhang, M. Okhawilai, S. Wang, J. Han, J. Qin and Y. Huang, *Nano Energy*, 2021, 89, 106322.
- [S7] Y. Wang, X. Lin, L. Wang, Y. Yang, Y. Zhang and A. Pan, *Adv. Funct. Mater.*, 2023, 33, 2211088.
- [S8] J.-H. Wang, L.-F. Chen, W.-X. Dong, K. Zhang, Y.-F. Qu, J.-W. Qian and S.-H. Yu, *ACS Nano*, 2023, 17, 19087–19097.
- [S9] J. Zhou, M. Xie, F. Wu, Y. Mei, Y. Hao, R. Huang, G. Wei, A. Liu, L. Li and R. Chen, *Adv. Mater.*, 2021, 33, 2101649.
- [S10] X. Cai, X. Wang, Z. Bie, Z. Jiao, Y. Li, W. Yan, H. J. Fan and W. Song, *Adv. Mater.*, 2024, 36, 2306734.
- [S11] H. Qin, W. Kuang, N. Hu, X. Zhong, D. Huang, F. Shen, Z. Wei, Y. Huang, J. Xu and H. He, *Adv. Funct. Mater.*, 2022, 32, 2206695.
- [S12] Q. Guan, J. Li, L. Li, P. Chai, Y. Li, S. Zhang, X. Yu, L. Bao, J. Peng and X. Li, *Chem. Eng. J.*, 2023, 476, 146534.
- [S13] T. C. Li, C. Lin, M. Luo, P. Wang, D.-S. Li, S. Li, J. Zhou and H. Y. Yang, *ACS Energy Lett.*, 2023, 8, 3258–3268.
- [S14] Z. Jiao, X. Cai, X. Wang, Y. Li, Z. Bie and W. Song, *Adv. Energy Mater.*, 2023, 13, 2302676.
- [S15] Y. Yu, P. Zhang, W. Wang and J. Liu, *Small Methods*, 2023, 7, 2300546.
- [S16] C. Meng, W. He, L. Jiang, Y. Huang, J. Zhang, H. Liu and J.-J. Wang, *Adv. Funct. Mater.*, 2022, 32, 2207732.
